# Supplementary material for: Therapeutic Potential of Combining IL-6 and TNF Blockade in a Mouse Model of Allergic Asthma
Source: MDPI journal article supplement (doi:10.3390/ijms23073521), 2022-03-24
Supplement: s1 [file s1]

# Therapeutic potential of combining IL-6 and TNF blockade in a mouse model of allergic asthma

Olga A. Namakanova, Ekaterina A. Gorshkova, Ruslan V. Zvartsev, Sergei A. Nedospasov, Marina S. Drutskay and Ekaterina O. Gubernatorova

Table S1

**Table S1.** Antibodies for flow cytometry.

| Antigen               | Fluorochrome    | Clone    | Company       |
|-----------------------|-----------------|----------|---------------|
| Fixable Viability Dye | eFluor-780      |          | eBioscience   |
| CD45                  | PerCP-Cy7.5     | 30-F11   | Biolegend     |
| TCRb                  | PerCP-Cy7.5     | H57-597  | eBioscience   |
| CD4                   | bv510           | RM4-5    | Biolegend     |
| CD11c                 | APC             | N418     | eBioscience   |
| CD11b                 | PE-Cy7          | M1/70    | Biolegend     |
| SiglecF               | PE              | E50-2440 | BD Pharmingen |
| Ly6G                  | FITC            | 1A8      | Biolegend     |
| IL-13                 | Alexa Fluor 433 | eBio13A  | eBioscience   |
| IL-17A                | PB              | eBio17B7 | eBioscience   |
| TNF                   | PE              | MP6-XT22 | eBioscience   |
| IFN $\gamma$          | FITC            | XMG1.2   | eBioscience   |
| ROR $\gamma$ t        | APC             | B2D      | eBioscience   |
| HELIOS                | FITC            | 22F6     | Biolegend     |
| FoxP3                 | APC             | FJK-16s  | eBioscience   |

Table S2

**Table S2.** Nucleotide sequences of primers used.

| Gene name     | Sequence                  |                                |
|---------------|---------------------------|--------------------------------|
|               | Forward                   | Reverse                        |
| <i>Actb</i>   | CTCCTGAGCGCAAGTACTCTGTG   | TAAAACGCAGCTCAGTAACAGTCC       |
| <i>Tgfb1</i>  | CAACAATTCCTGGCGTTACCT     | GGCTGATCCCGTTGATTTCC           |
| <i>Il17a</i>  | GGACTCTCCACCGCAATGA       | GGCACTGAGCTTCCCAGATC           |
| <i>Ifng</i>   | TCAAGTGGCATAGATGTGGAAGAA  | TGGCTCTGCAGGATTTTCATG          |
| <i>Muc5ac</i> | AGAATATCTTTCAGGACCCCTGCT  | ACACCAGTGCTGAGCATACTTTT        |
| <i>Muc5b</i>  | TCCTGCTCTGGAATATCCAAG     | GCCTCGGGGAGCTTGCCTGCC          |
| <i>Areg</i>   | ACCATAAGCGAAATGCCTTCTG    | CTTAATCACCTGTTCAACTCTGACTG     |
| <i>Col1a1</i> | ACGCCATCAAGGTCTACTG       | GTACTCGAACGGGAATCCA            |
| <i>Il5</i>    | AGCACAGTGGTGAAAGAGACCTT   | TCCAATGCATAGCTGGTGATTT         |
| <i>Il4</i>    | GGTCTCAACCCCCAGCTAGT      | GCCGATGATCTCTCTCAAGTGAT        |
| <i>Il13</i>   | CCTGGCTCTTGCTTGCCTT       | GGTCTTGTGTGATGTTGCTCA          |
| <i>Il10</i>   | CCAGTTTTACCTGGTAGAAGTGATG | TGTCTAGGTCCTGGAGTCCAGCAGACTCAA |
| <i>Il33</i>   | TGCTCAATGTGTCAACAGACG     | TCCTTGCTTGGCAGTATCCA           |

Figure S1

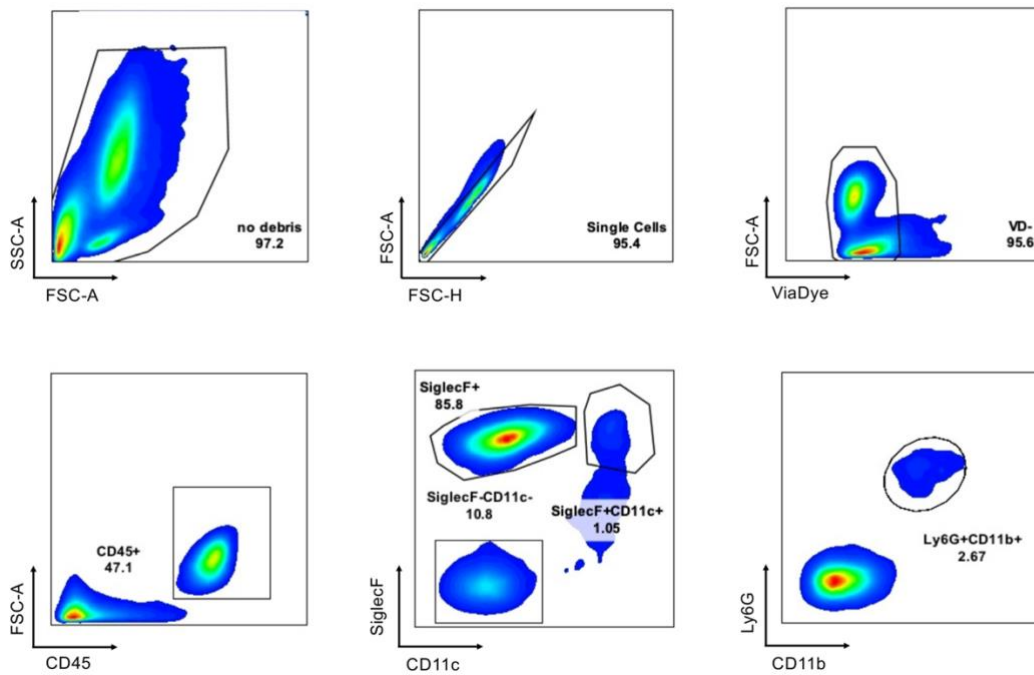

**Figure S1.** Flow cytometry gating strategy for identification of granulocytes in the BALF. Eosinophils and alveolar macrophages are indicated as ViaDye<sup>-</sup>CD45<sup>+</sup>SiglecF<sup>+</sup>CD11c<sup>-</sup> and ViaDye<sup>-</sup>CD45<sup>+</sup>SiglecF<sup>+</sup>CD11c<sup>+</sup>, respectively. Neutrophils Ly6G<sup>+</sup>CD11b<sup>+</sup> were gated on SiglecF<sup>+</sup>CD11c<sup>-</sup> cells. Frequencies (%) of SiglecF<sup>+</sup>CD11c<sup>-</sup>, Ly6G<sup>+</sup>CD11b<sup>+</sup> and SiglecF<sup>+</sup>CD11c<sup>+</sup> were counted from CD45<sup>+</sup> cells.

Figure S2

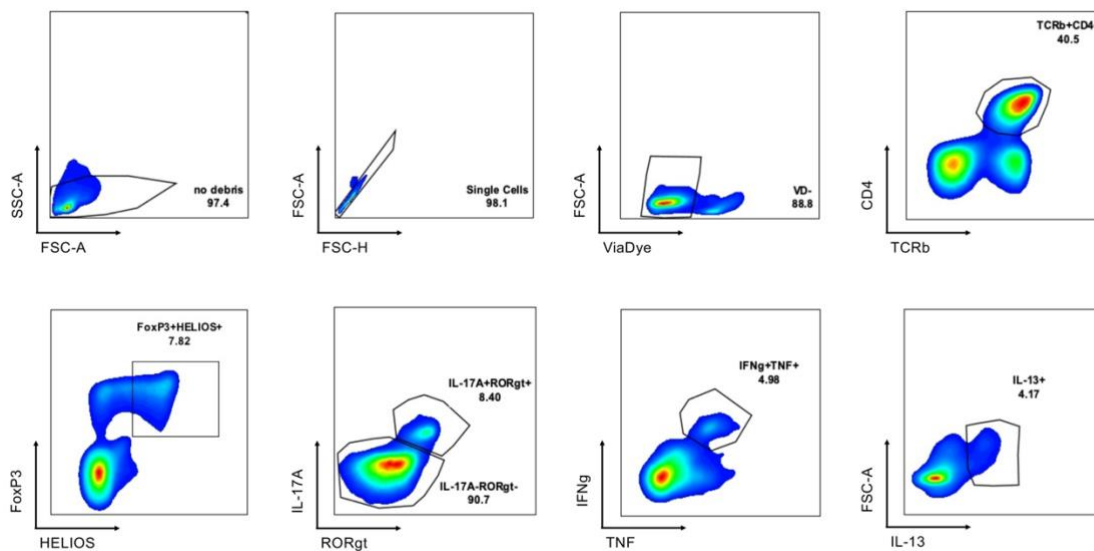

**Figure S2.** Representative flow cytometry gating strategy for identification of Th-cell subsets in the lungs and on the periphery. Activated Th-cells with PMA and ionomycin were identified as ViaDye<sup>-</sup>TCRb<sup>+</sup>CD4<sup>+</sup> cells. FoxP3<sup>+</sup>HELIOS<sup>+</sup>, IL-17A<sup>+</sup>RORgt<sup>+</sup>, TNF<sup>+</sup>IFNg<sup>+</sup> and IL-13<sup>+</sup> Th-cells were gated on TCRb<sup>+</sup>CD4<sup>+</sup> cells, respectively.

Figure S3

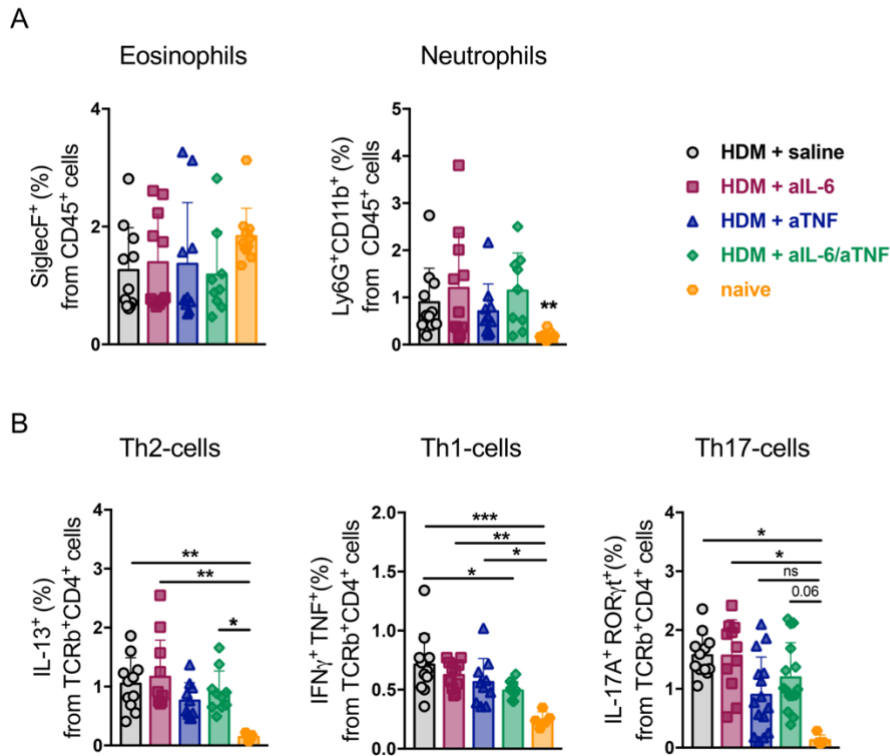

**Figure S3.** Analysis of myeloid cells and Th-lymphocytes in the spleen from mice under IL-6 and TNF inhibition and saline as a control. (A) The frequency (%) of eosinophils (SiglecF<sup>+</sup> CD11c<sup>-</sup>) and neutrophils (Ly6G<sup>+</sup> CD11b<sup>+</sup>) gated on CD45<sup>+</sup> live cells. (B) Representative frequencies (%) of Th2-cells (IL-13<sup>+</sup>), Th1-cells (TNF<sup>+</sup> IFN $\gamma$ <sup>+</sup>) and Th17-cells (IL-17A<sup>+</sup> ROR $\gamma$ t<sup>+</sup>) gated on TCRb<sup>+</sup> CD4<sup>+</sup> live cells. Data represent mean  $\pm$  SD, 10-12 mice per group with each point representing a single mouse. \*  $p < 0.05$ ; \*\*  $p < 0.01$ ; \*\*\*  $p < 0.001$ ; ns, nonsignificant (one-way ANOVA test was used).

Figure S4

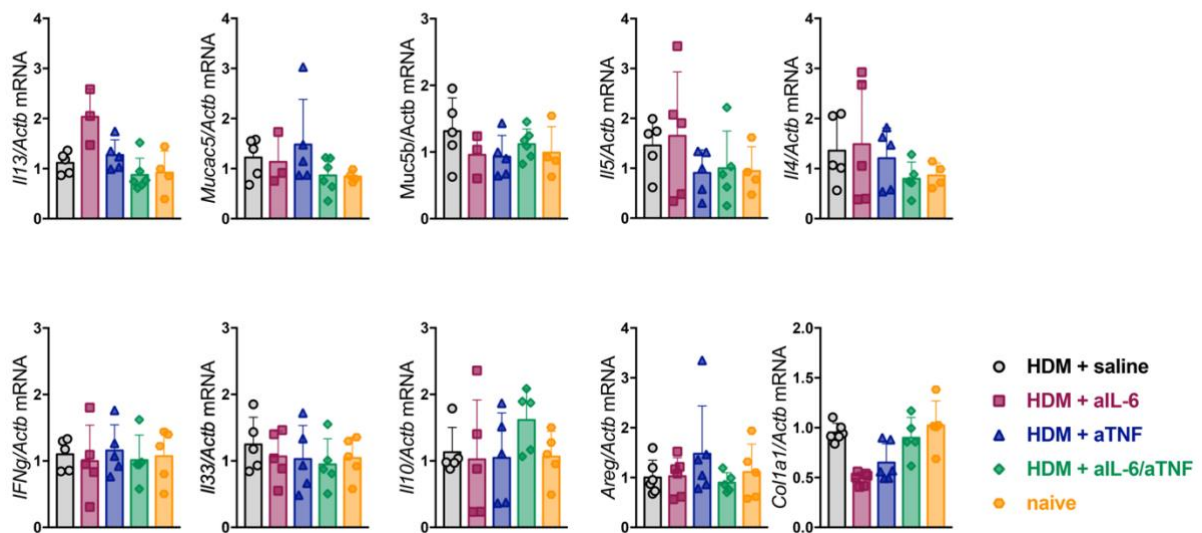

**Figure S4.** Quantitative RT-PCR analysis of asthma-associated genes. Relative expression of *Il13*, *Muc5ac*, *Muc5b*, *Il5*, *Il4*, *Ifng*, *Il33*, *Il10*, *Areg* and *Col1a1* genes were normalized to *Actb* in the lungs. Data are representative of 2 independent experiments with five mice per group in each experiment; mean  $\pm$  SD. \*  $p < 0.05$  (one-way ANOVA test was used).

Figure S5

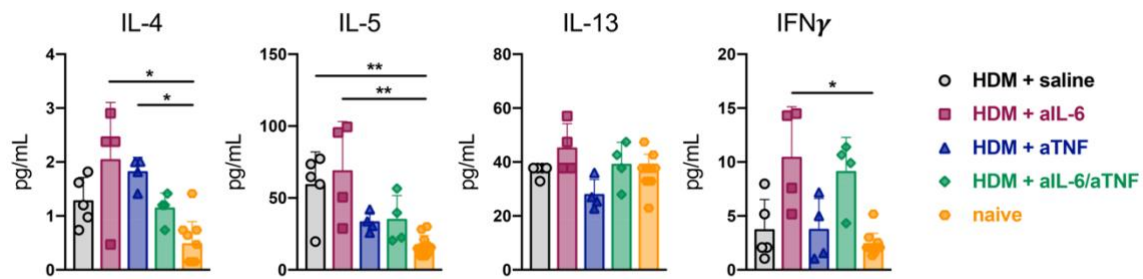

**Figure S5.** Quantification of cytokine production by multiplex analysis. Cytokine levels (pg/mL) in mouse serum were measured using a multiplex microbead-based immunoassay. Data are representative of 2 independent experiments; mean  $\pm$  SD, 3-5 mice per group. \* p < 0.05; \*\* p < 0.01 (one-way ANOVA test was used).
